# Supplementary material for: New Insights into Dehalococcoides mccartyi Metabolism from a Reconstructed Metabolic Network-Based Systems-Level Analysis of D. mccartyi Transcriptomes
Source: PubMed Central journal article supplement (PMC3986231; doi:10.1371/journal.pone.0094808), 2014-04-14
Supplement: pone.0094808.s002.pdf [file pone.0094808.s002.pdf]

## File S2

### **New Insights into *Dehalococcoides mccartyi* Metabolism from a Reconstructed Metabolic Network-Based Systems-Level Analysis of *D. mccartyi* Transcriptomes**

M. Ahsanul Islam, Alison S. Waller, Laura A. Hug, Nicholas J. Provard, Elizabeth A. Edwards,  
and Radhakrishnan Mahadevan\*

\*Corresponding author

[ahsan.islam@utoronto.ca](mailto:ahsan.islam@utoronto.ca)

[alison.waller@embl.de](mailto:alison.waller@embl.de)

[laura.hug@berkeley.edu](mailto:laura.hug@berkeley.edu)

[nicholas.provard@utoronto.ca](mailto:nicholas.provard@utoronto.ca)

[elizabeth.edwards@utoronto.ca](mailto:elizabeth.edwards@utoronto.ca)

[krishna.mahadevan@utoronto.ca](mailto:krishna.mahadevan@utoronto.ca)

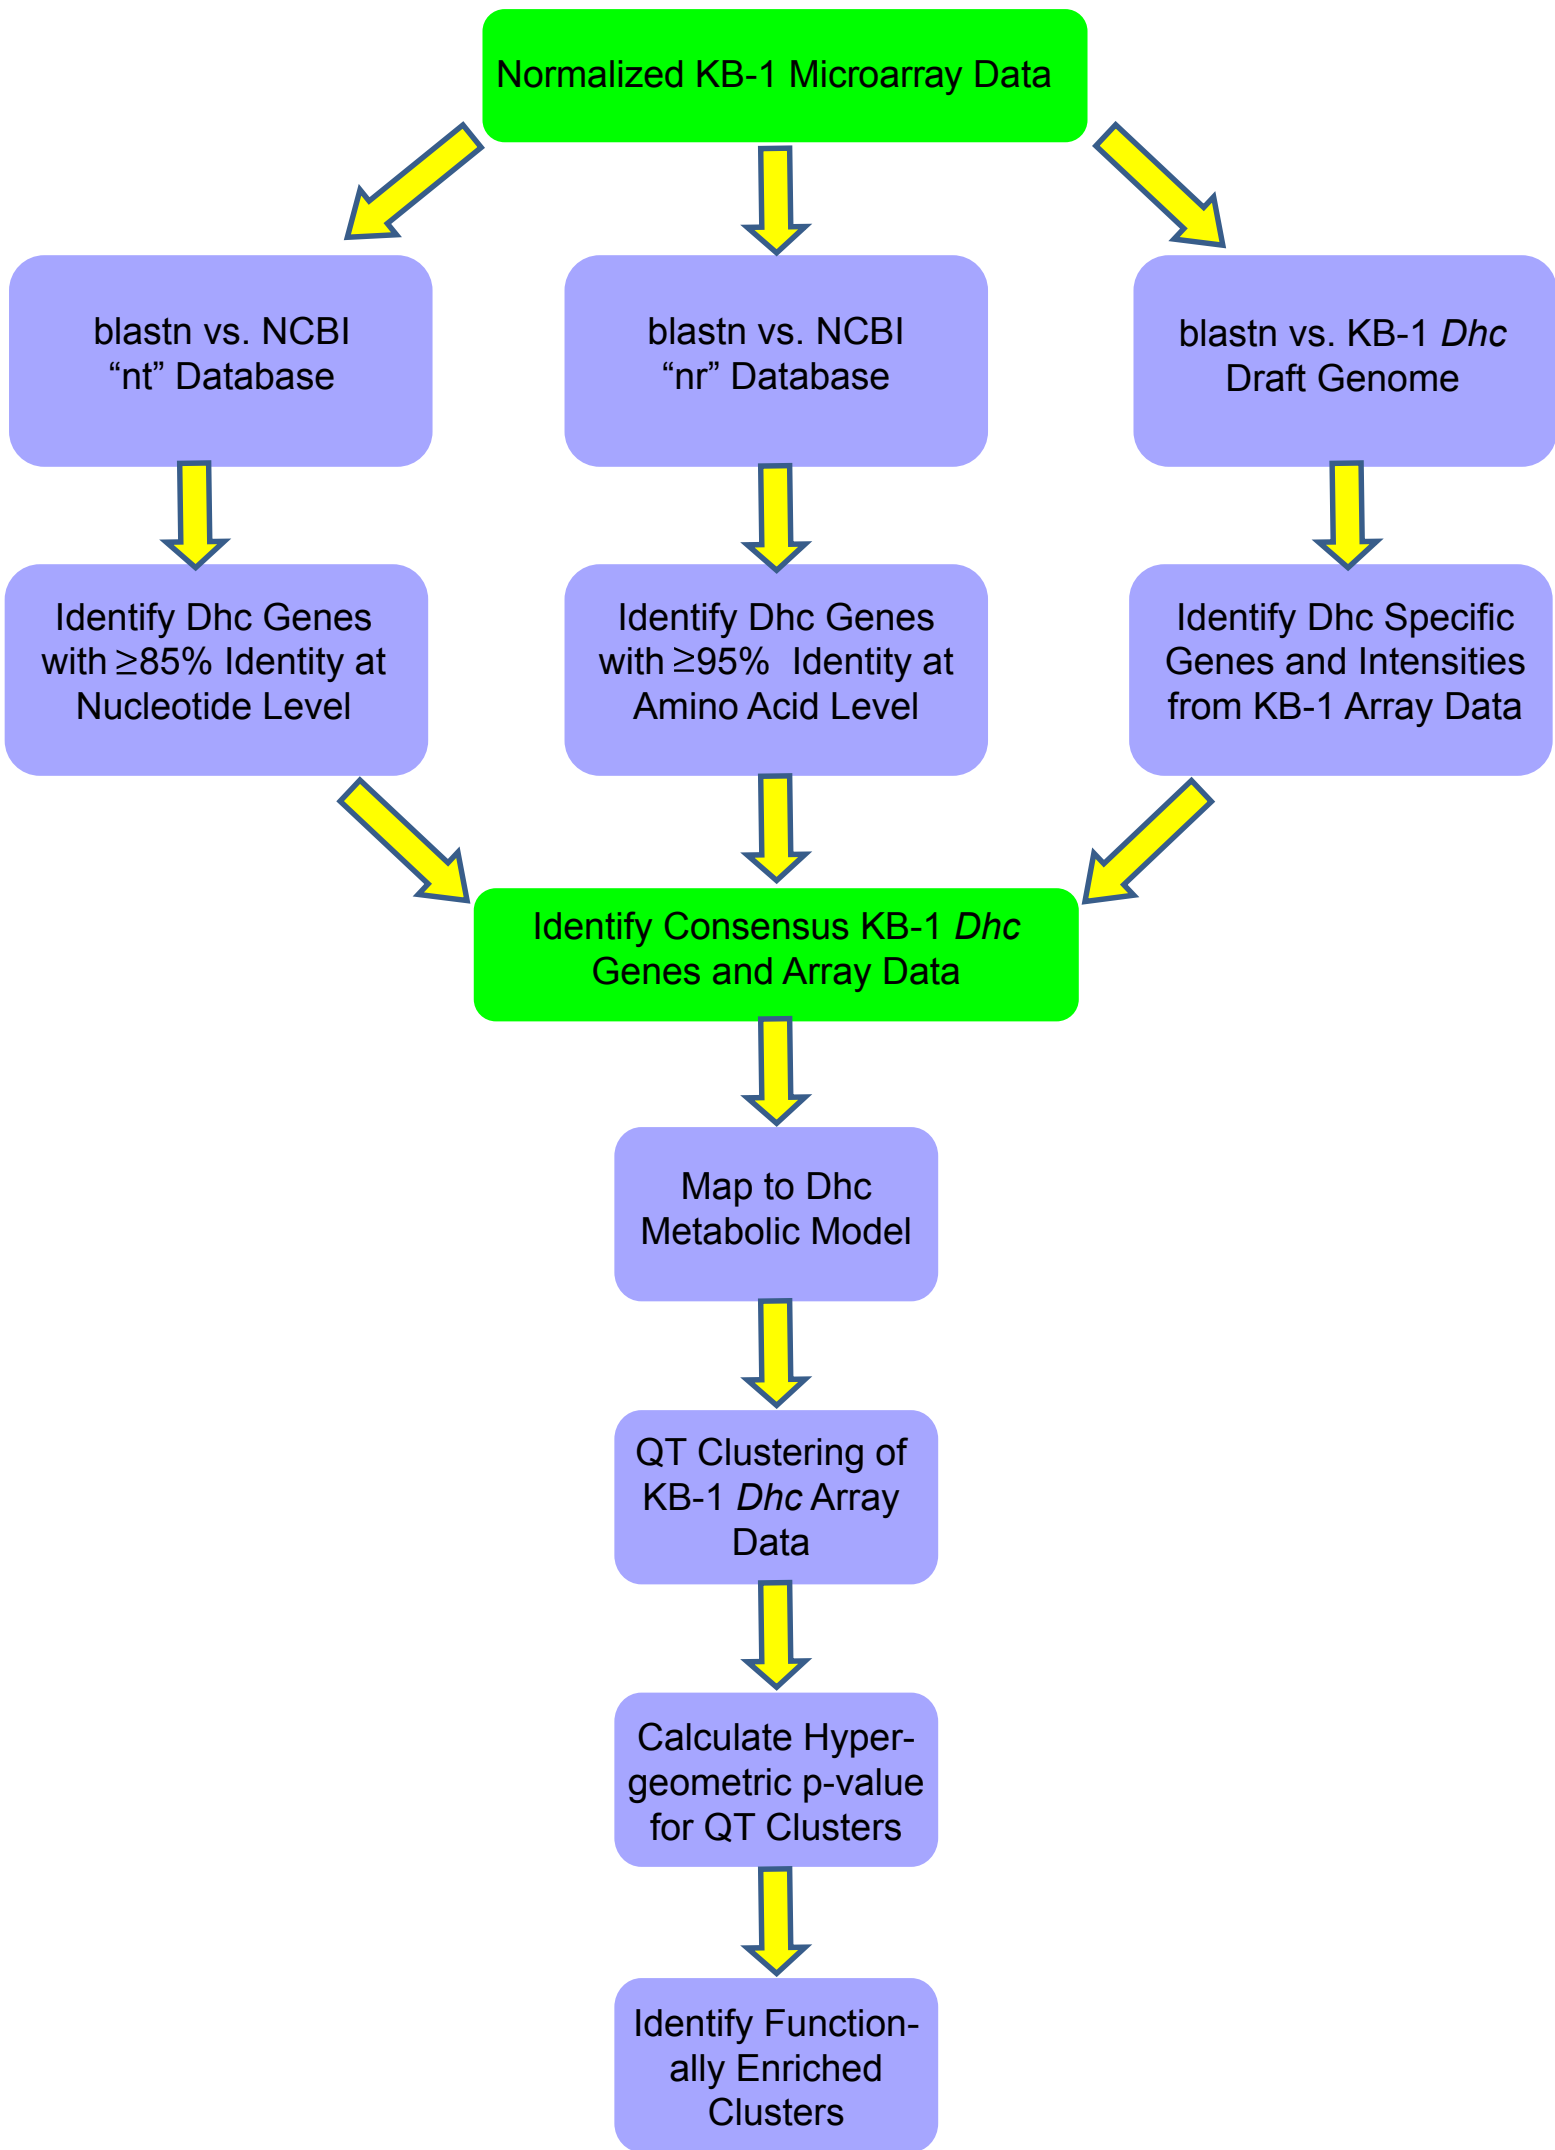

Figure S1. Workflow for Analyzing Pre-Processed KB-1 Microarray Data

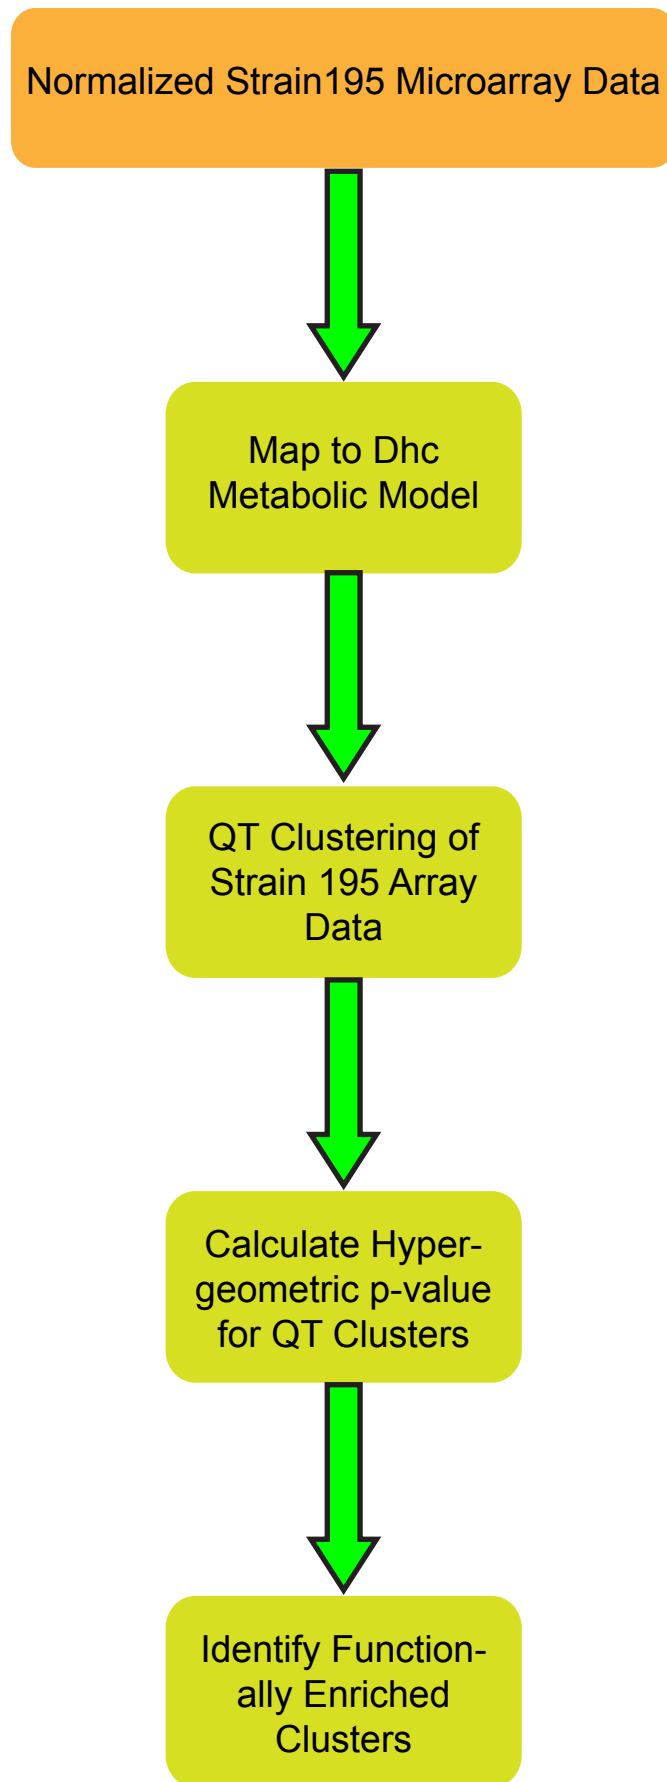

**Figure S2. Workflow for Analyzing Pre-Processed Strain 195 Microarray Data**

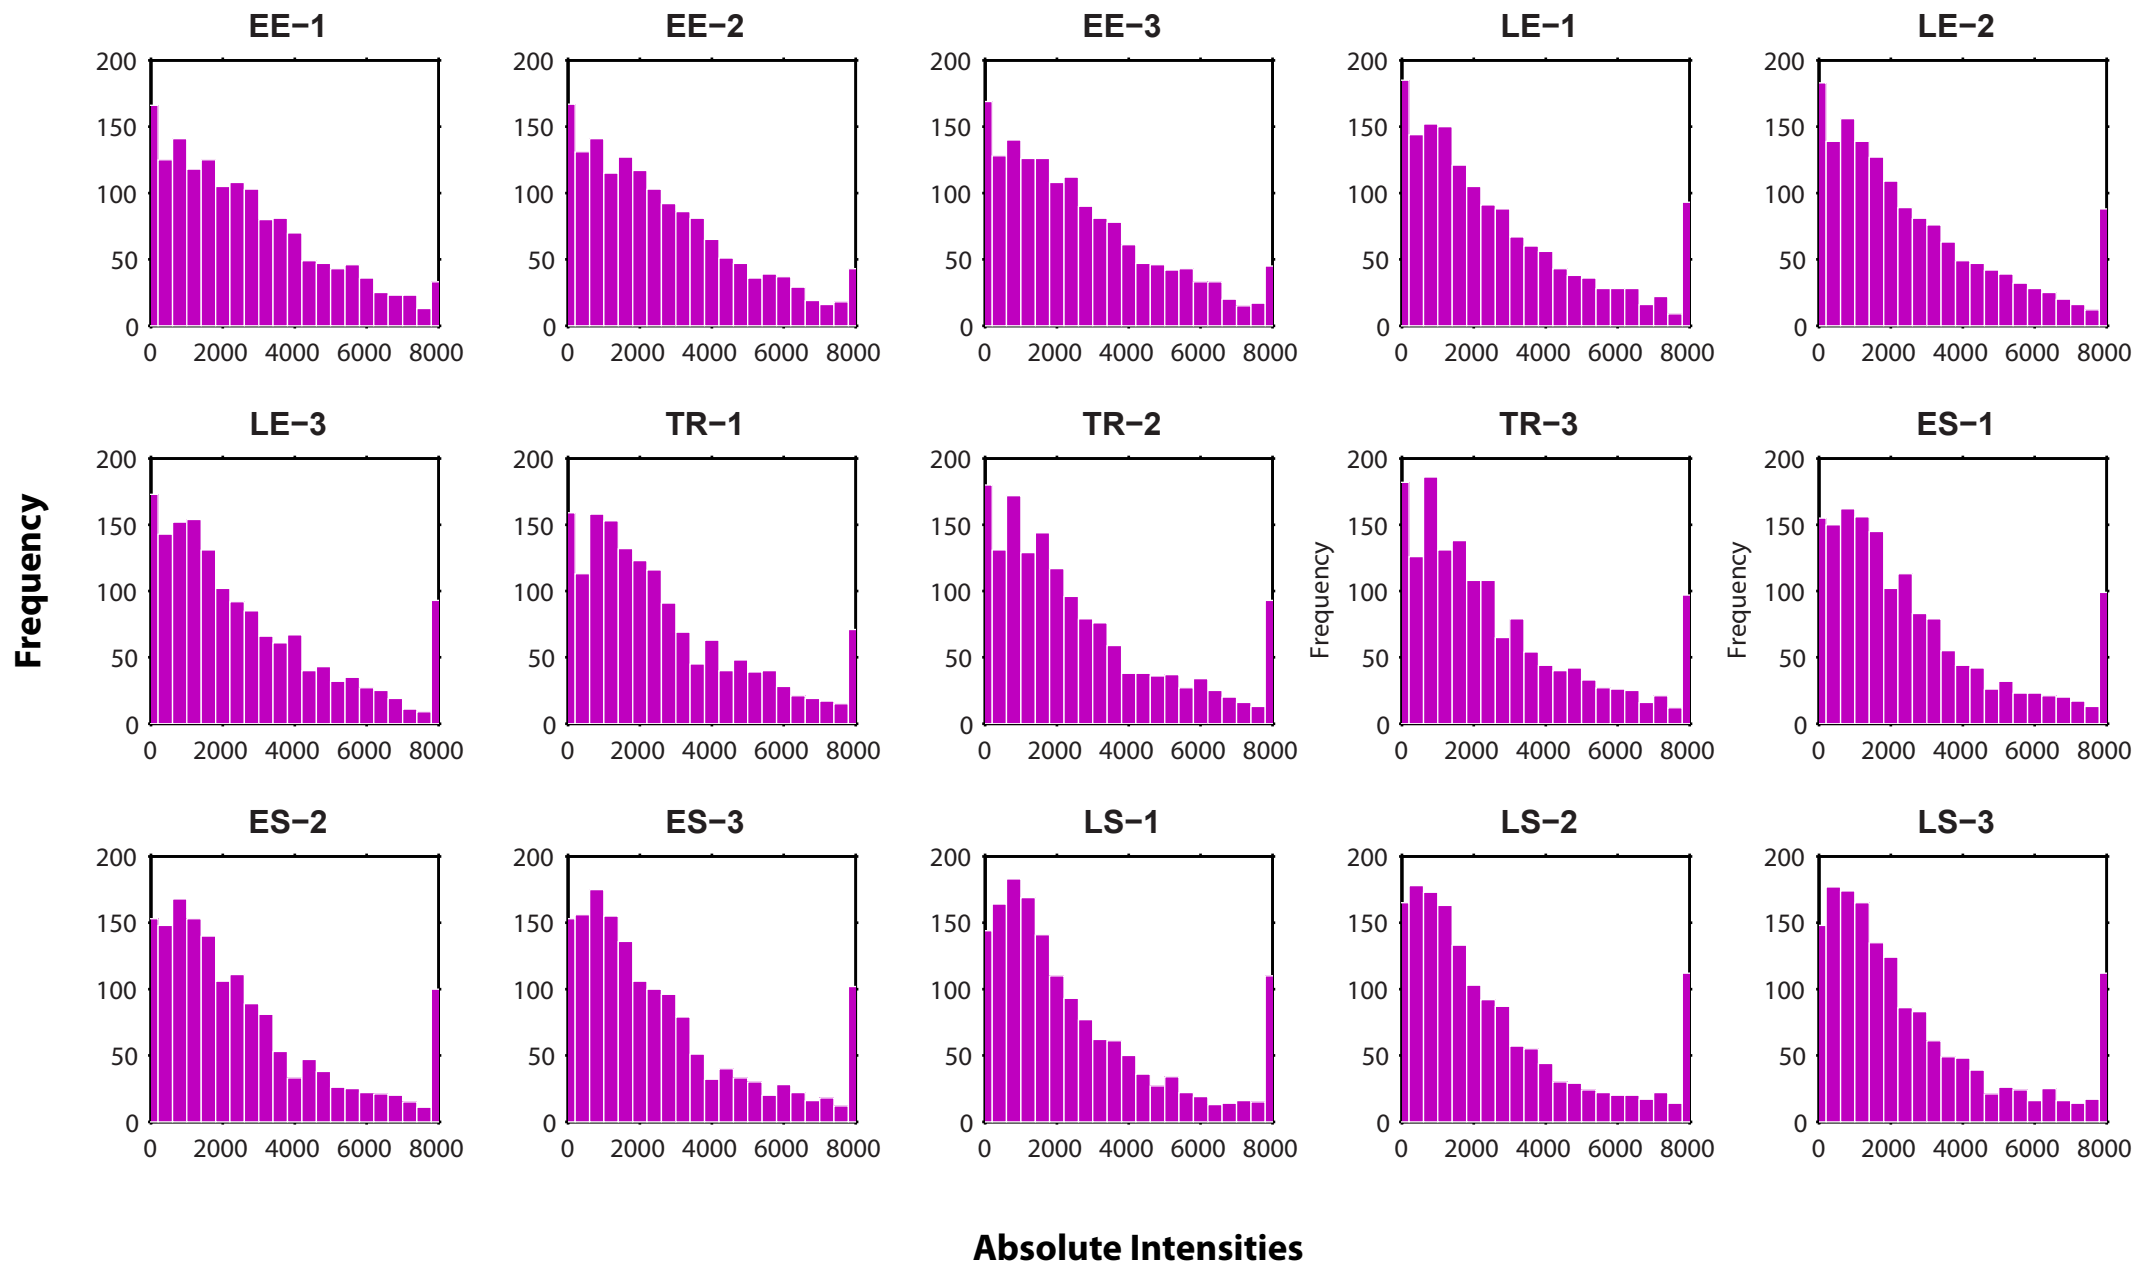

**Figure S3. Distribution of Strain 195 Gene Expression Intensities for 27 Samples**

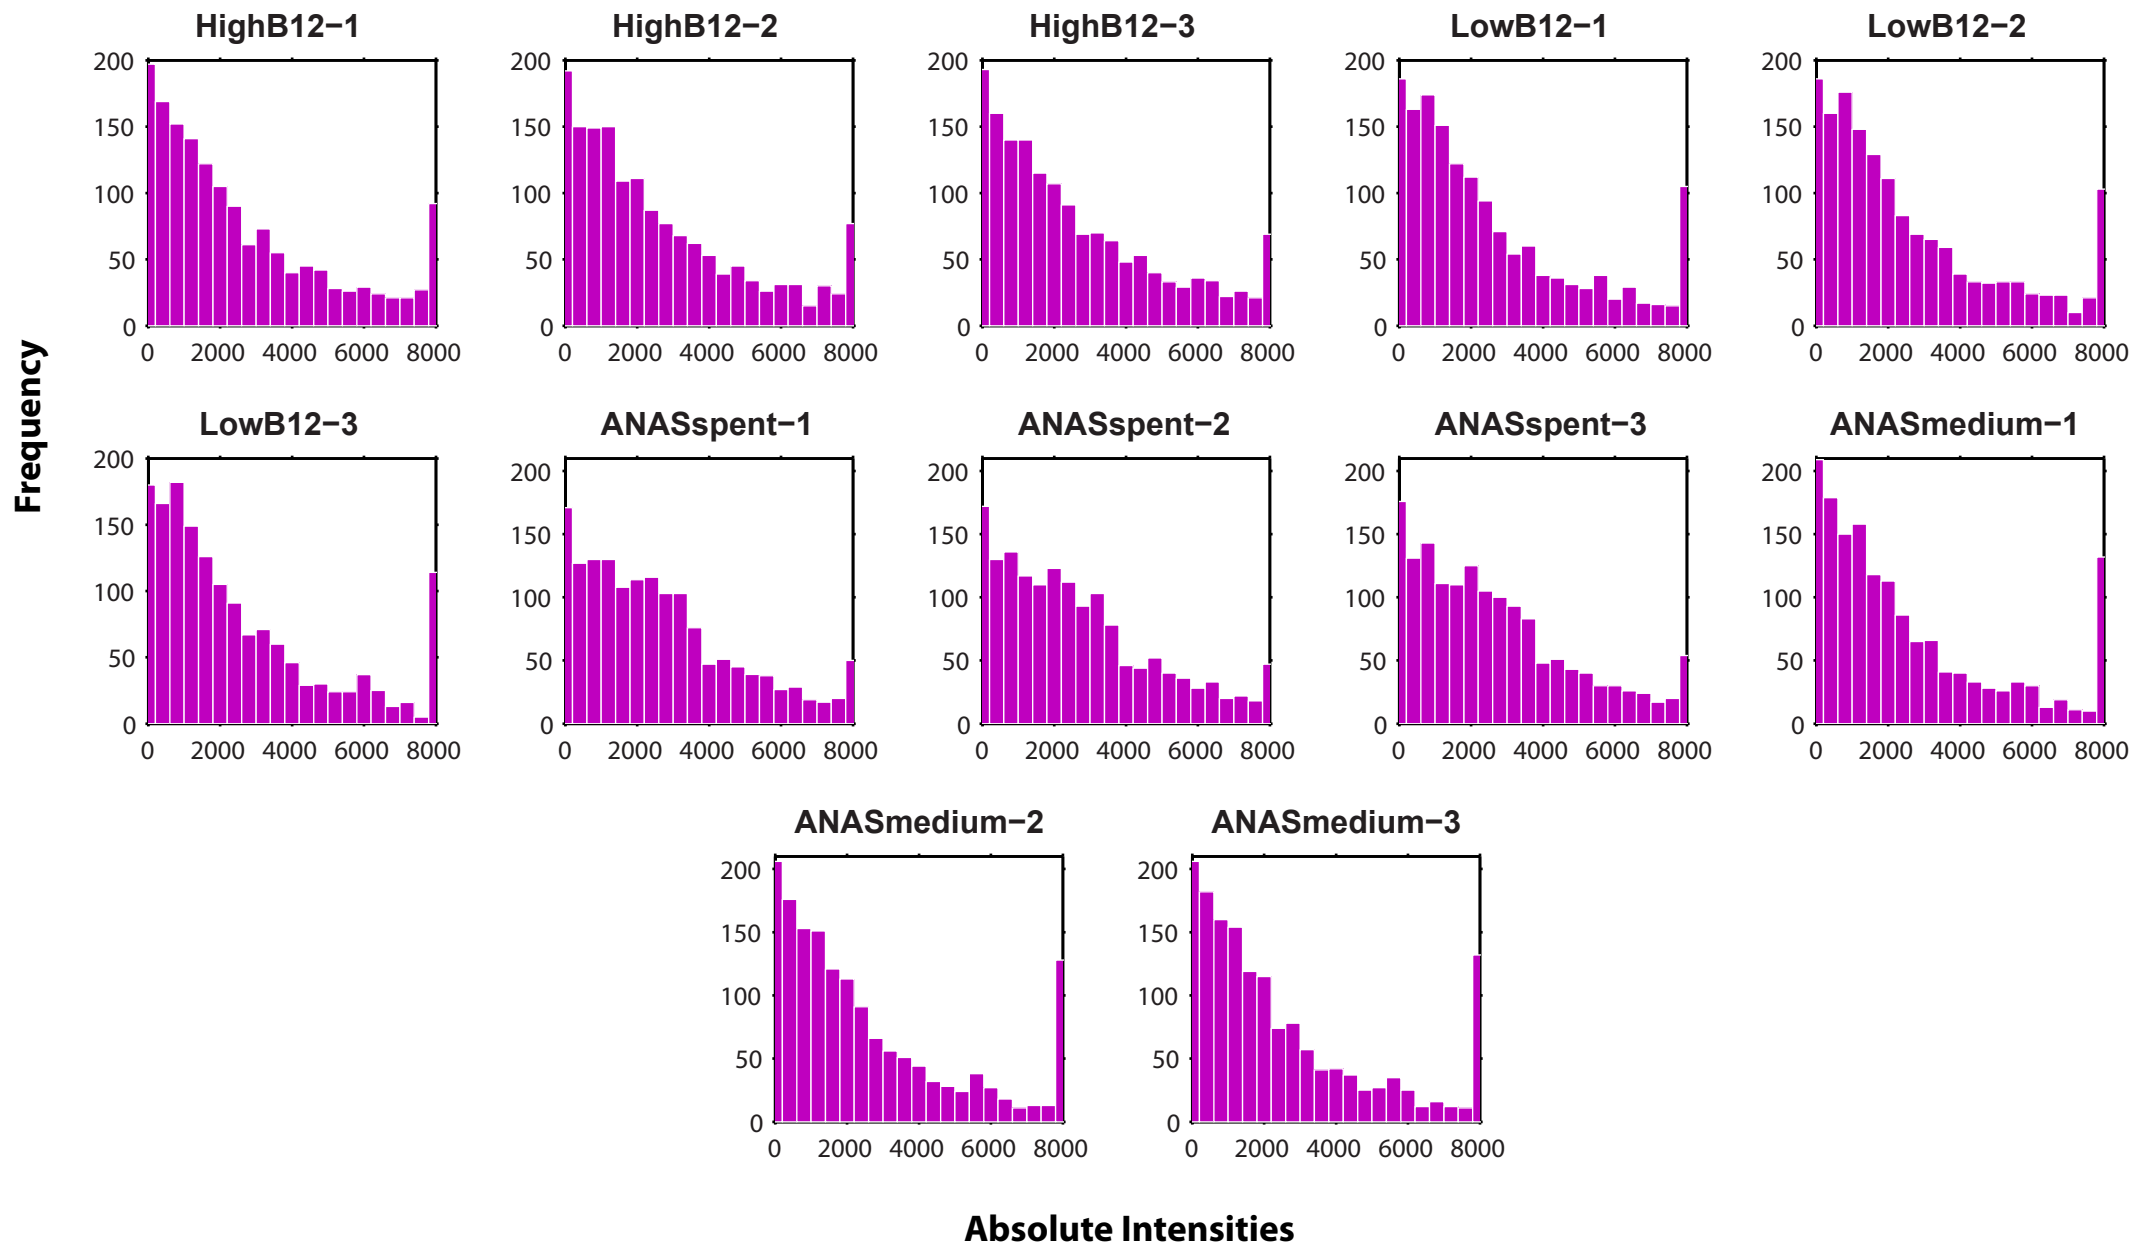

**Figure S3. Distribution of Strain 195 Gene Expression Intensities for 27 Samples (continued from previous page)**

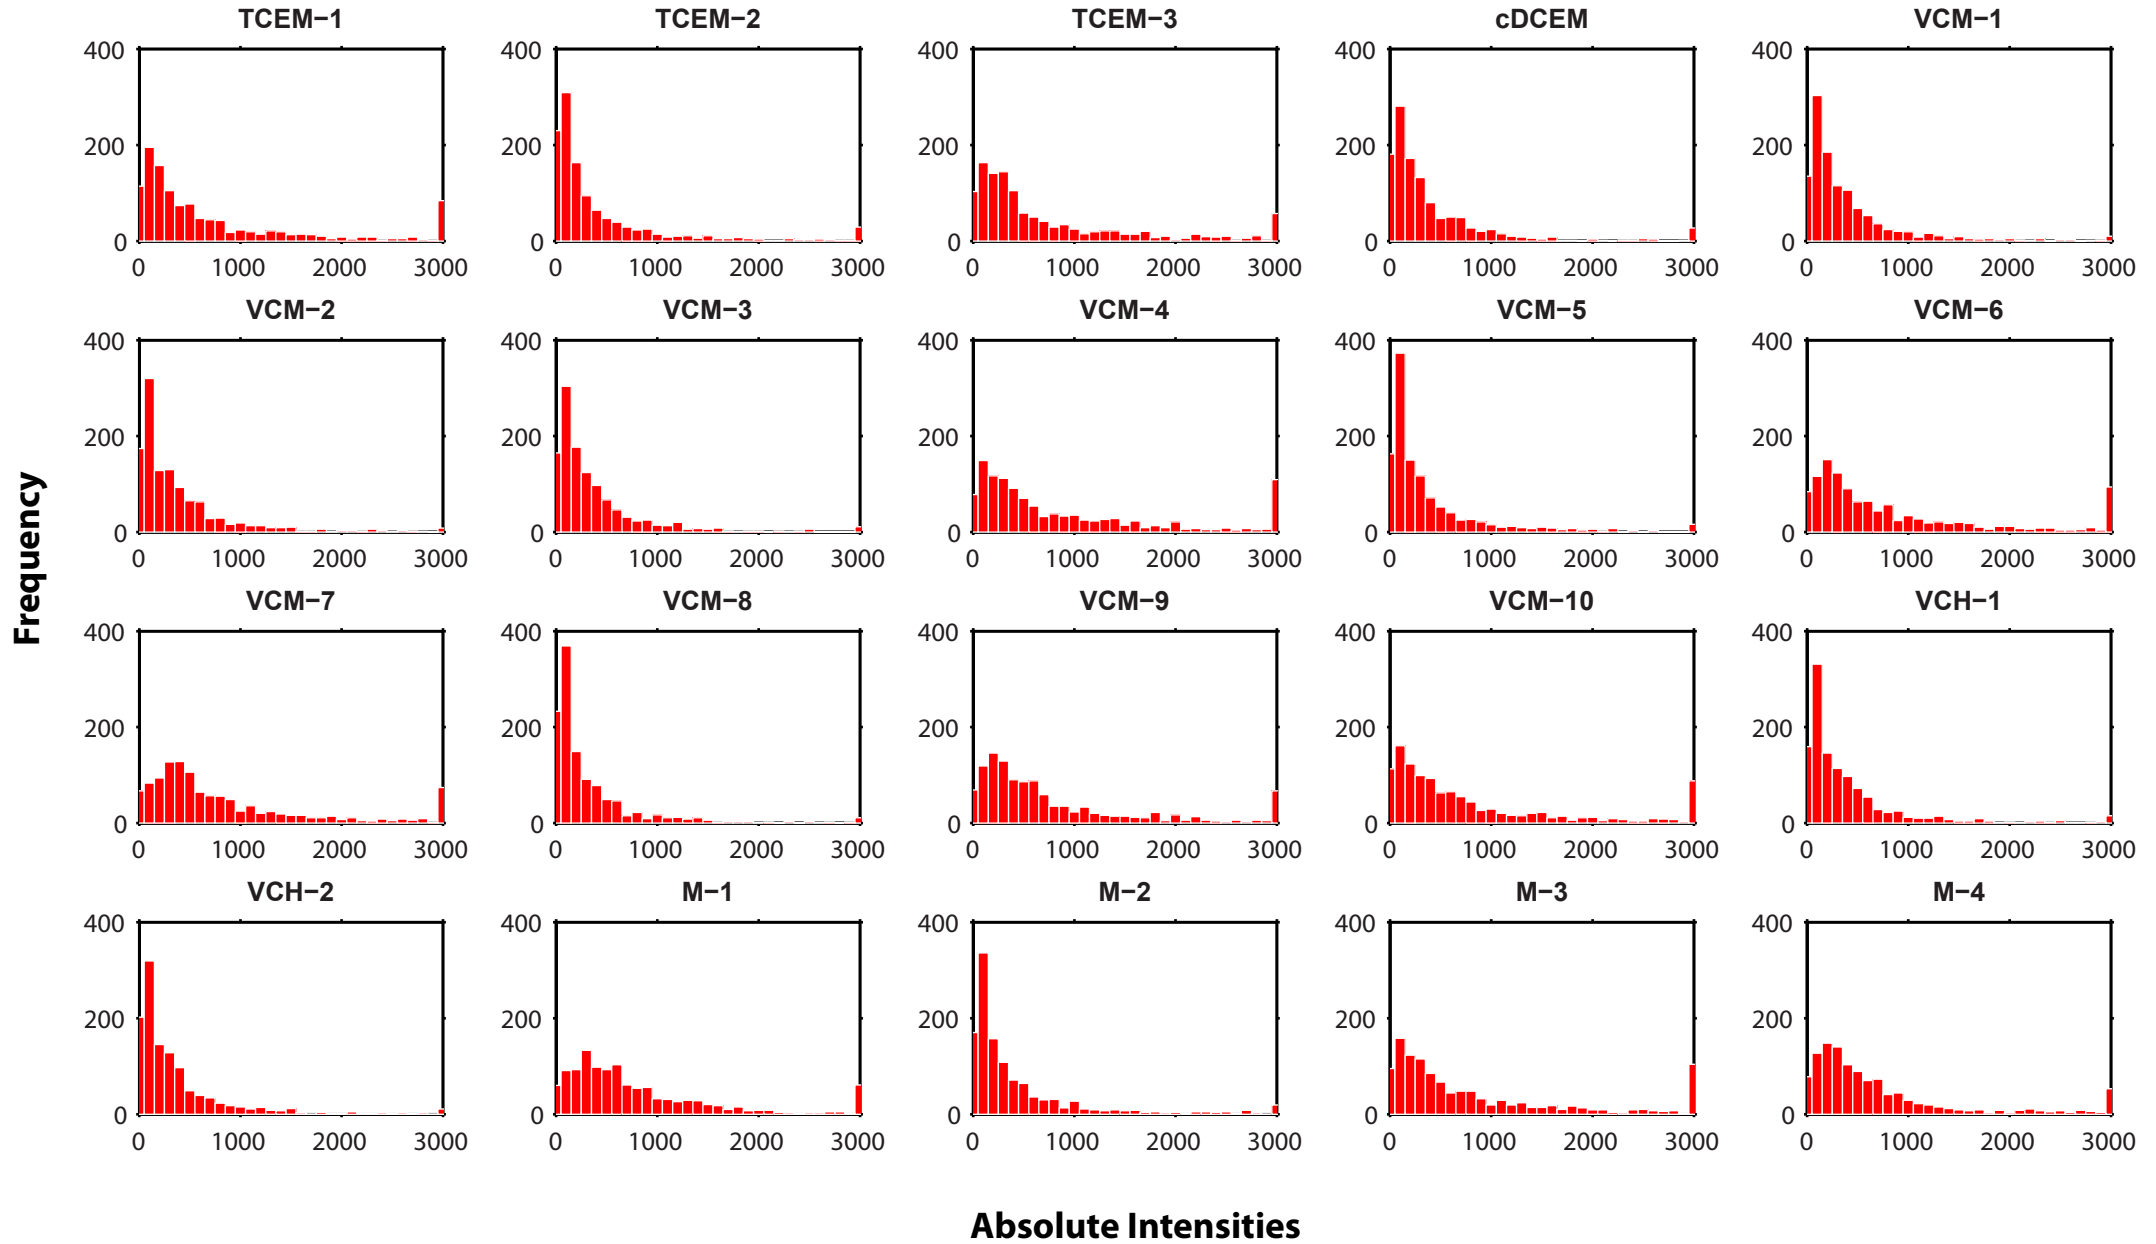

**Figure S4. Distribution of KB-1 *Dhc* Gene Expression Intensities for 33 Samples**

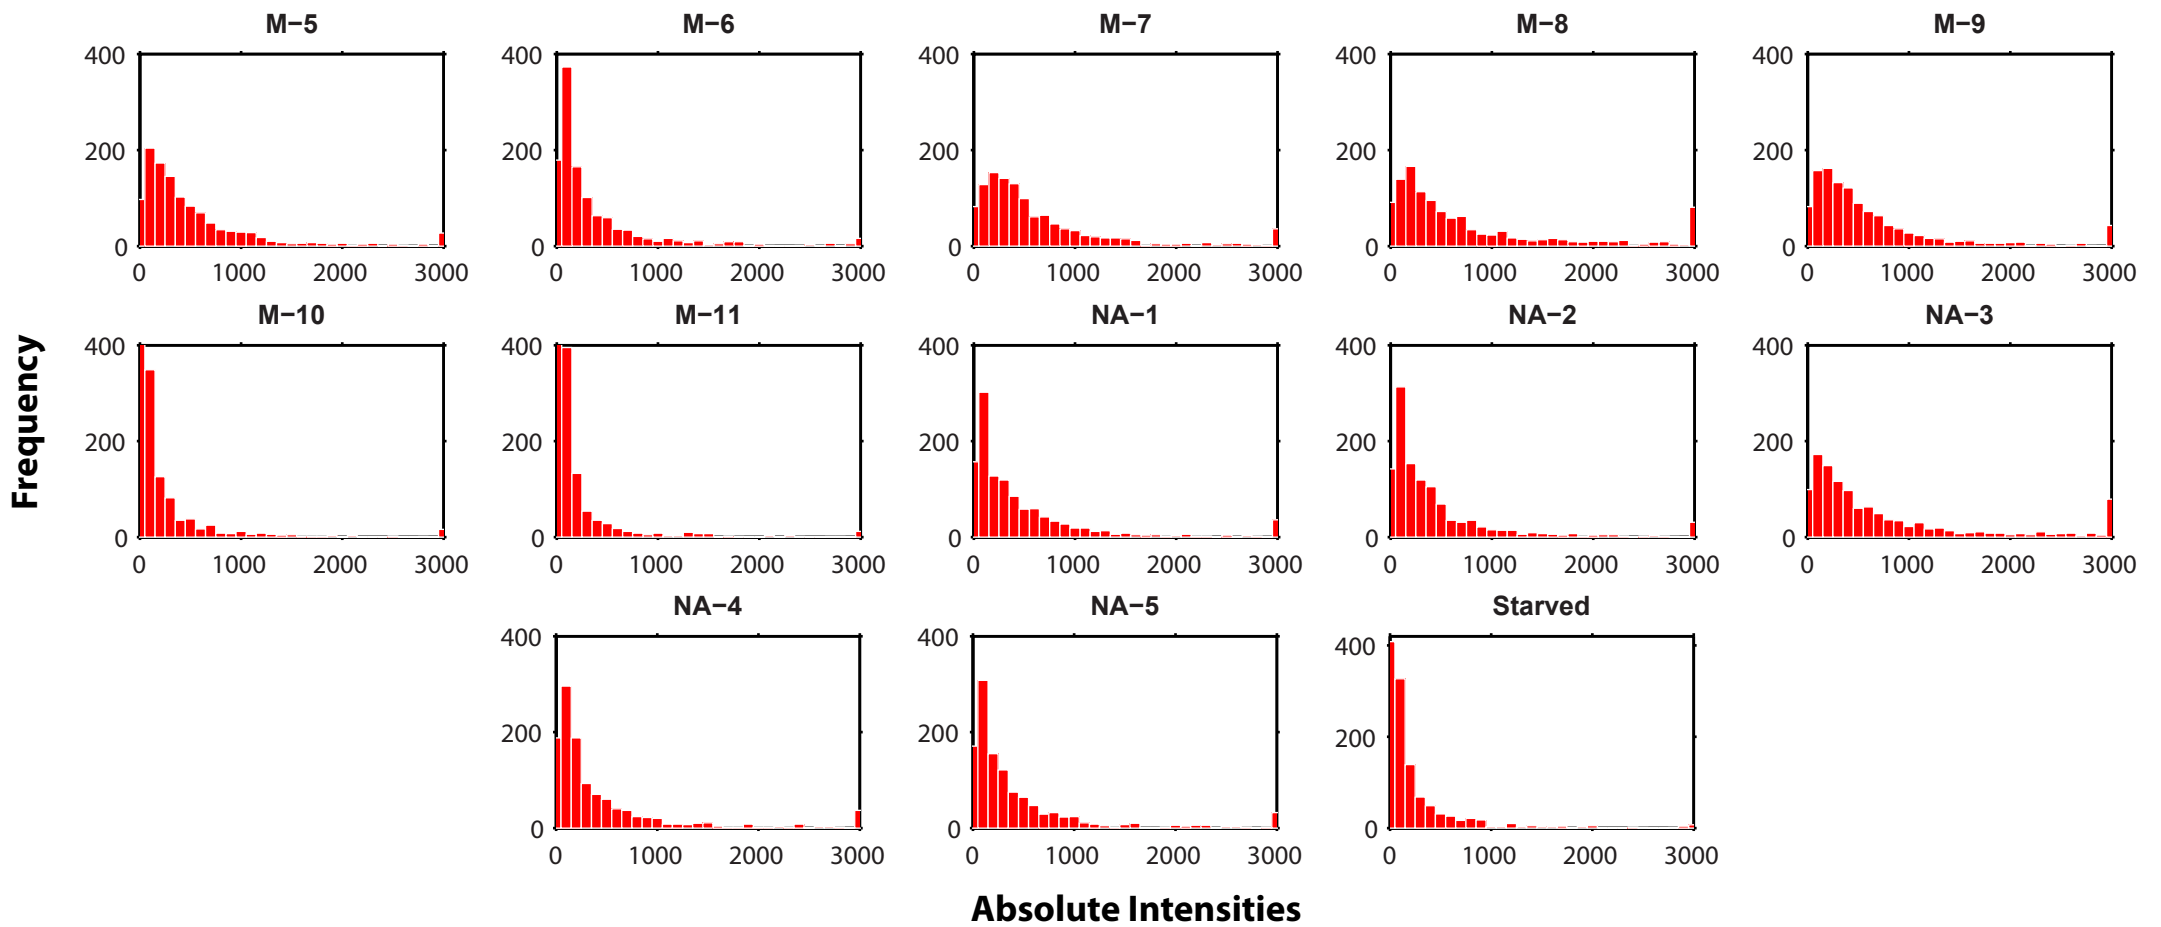

**Figure S4. Distribution of KB-1 *Dhc* Gene Expression Intensities for 33 Samples (continued from previous page)**
